# Supplementary material for: Effect of inorganic nutrients on bacterial community composition in oil-bearing sandstones from the subsurface strata of an onshore oil reservoir and its potential use in Microbial Enhanced Oil Recovery
Source: PLoS One. 2018 Nov 29;13(11):e0198050. doi: 10.1371/journal.pone.0198050 (PMC6264815; doi:10.1371/journal.pone.0198050)
Supplement: S1 File — The rarefied OTUs (16,828) were obtained by subsampling method and statistical calculation was performed using the non-parametric Mann-Whitney U test. (XLSX) [file pone.0198050.s001.xlsx]

## Sheet: Figure2A
	Raw data
	sample/NO. subsampling sequence	5053	10096	16820		statistical analysis result
	C1P	357.6	542.4	748.4		Mann-Whitney U test for subsampling number of 5053
	C2P	261.1	409.9	557.8		data: water and nutrient
	C3P	364.9	543.3	729.7		W = 22, p-value = 0.5887
	C4P	229.3	350.9	493.5		alternative hypothesis: true location shift is not equal to 0
	C5P	311.7	461.5	611
	C6P	313.2	483.1	648		statistical analysis result
	C1N	329	503.8	682.4		Mann-Whitney U test for subsampling number of 10096
	C2N	340.1	517.5	700.8		data: water and nutrient
	C3N	278.9	431.6	590.1		W = 21, p-value = 0.6991
	C4N	266.4	425.2	573.8		alternative hypothesis: true location shift is not equal to 0
	C5N	293.6	436.7	618.4
	C6N	228.7	361.3	504		statistical analysis result
						Mann-Whitney U test for subsampling number of 16820
						data: water and nutrient
						W = 20, p-value = 0.8182
						alternative hypothesis: true location shift is not equal to 0

## Sheet: Figure2B
	Raw data
	shannon diversity index	sample Id	group
	4.40788	C1P	water		statistical analysis result
	4.28424	C2P	water		Mann-Whitney U test
	4.89903	C3P	water		data: water and nutrient
	3.32766	C4P	water		W = 4, p-value = 0.02597
	4.85189	C5P	water		alternative hypothesis: true location shift is not equal to 0
	4.20927	C6P	water
	3.20111	C1N	nutrient
	3.9777	C2N	nutrient
	3.4533	C3N	nutrient
	4.12372	C4N	nutrient
	3.95425	C5N	nutrient
	3.05111	C6N	nutrient
